# Supplementary material for: Fetal Mesenchymal Stromal Cells Differentiating towards Chondrocytes Acquire a Gene Expression Profile Resembling Human Growth Plate Cartilage
Source: PubMed Central journal article supplement (PMC3489884; doi:10.1371/journal.pone.0044561), 2012-11-05
Supplement: pone.0044561.s002.pdf [file pone.0044561.s002.pdf]

**Supplementary Table 1**

| <b>Affymetrix ID</b> | <b>Gene code</b> | <b>Gene title</b>                                                                   |
|----------------------|------------------|-------------------------------------------------------------------------------------|
| 205856_at            | SLC14A1          | solute carrier family 14 (urea transporter), member 1 (Kidd blood group)            |
| 205911_at            | PTH1R            | parathyroid hormone receptor 1                                                      |
| 219148_at            | PBK              | PDZ binding kinase                                                                  |
| 213182_x_at          | CDKN1C           | cyclin-dependent kinase inhibitor 1C (p57, Kip2)                                    |
| 206737_at            | WNT11            | wingless-type MMTV integration site family, member 11                               |
| 203868_s_at          | VCAM1            | vascular cell adhesion molecule 1                                                   |
| 218730_s_at          | OGN              | osteoglycin (osteoinductive factor, mimecan)                                        |
| 200665_s_at          | SPARC            | secreted protein, acidic, cysteine-rich (osteonectin)                               |
| 223484_at            | C15orf48         | chromosome 15 open reading frame 48                                                 |
| 206315_at            | CRLF1            | cytokine receptor-like factor 1                                                     |
| 205497_at            | ZNF175           | zinc finger protein 175                                                             |
| 204724_s_at          | COL9A3           | collagen, type IX, alpha 3                                                          |
| 219410_at            | TMEM45A          | transmembrane protein 45A                                                           |
| 218391_at            | SNF8             | SNF8, ESCRT-II complex subunit, homolog (S. cerevisiae)                             |
| 210538_s_at          | BIRC3            | baculoviral IAP repeat-containing 3                                                 |
| 201487_at            | CTSC             | cathepsin C                                                                         |
| 219134_at            | ELTD1            | EGF, latrophilin and seven transmembrane domain containing 1                        |
| 212551_at            | CAP2             | CAP, adenylate cyclase-associated protein, 2 (yeast)                                |
| 206421_s_at          | SERPINB7         | serpin peptidase inhibitor, clade B (ovalbumin), member 7                           |
| 219837_s_at          | CYTL1            | cytokine-like 1                                                                     |
| 210220_at            | FZD2             | frizzled homolog 2 (Drosophila)                                                     |
| 207064_s_at          | AOC2             | amine oxidase, copper containing 2 (retina-specific)                                |
| 218542_at            | CEP55            | centrosomal protein 55kDa                                                           |
| 206423_at            | ANGPTL7          | angiopoietin-like 7                                                                 |
| 231227_at            | ---              | Transcribed locus, strongly similar to WNT-5A protein precursor                     |
| 229494_s_at          | CD63             | CD63 molecule                                                                       |
| 223734_at            | OSAP             | ovary-specific acidic protein                                                       |
| 206614_at            | GDF5             | growth differentiation factor 5 (cartilage-derived morphogenetic protein-1)         |
| 205713_s_at          | COMP             | cartilage oligomeric matrix protein                                                 |
| 230372_at            | ---              | Transcribed locus, PREDICTED: similar to hyaluronan synthase 2 [Pan troglodytes]    |
| 1563724_at           | SACS             | Spastic ataxia of Charlevoix-Saguenay (sacsin)                                      |
| 203499_at            | EPHA2            | EPH receptor A2                                                                     |
| 1556499_s_at         | COL1A1           | collagen, type I, alpha 1                                                           |
| 219230_at            | TMEM100          | transmembrane protein 100                                                           |
| 206790_s_at          | NDUFB1           | NADH dehydrogenase (ubiquinone) 1 beta subcomplex, 1, 7kDa                          |
| 204825_at            | MELK             | maternal embryonic leucine zipper kinase                                            |
| 212565_at            | STK38L           | serine/threonine kinase 38 like                                                     |
| 1554997_a_at         | PTGS2            | prostaglandin-endoperoxide synthase 2 (prostaglandin G/H synthase & cyclooxygenase) |
| 204894_s_at          | AOC3             | amine oxidase, copper containing 3 (vascular adhesion protein 1)                    |
| 203886_s_at          | FBLN2            | fibulin 2                                                                           |
| 203153_at            | IFIT1            | interferon-induced protein with tetratricopeptide repeats 1                         |
| 242517_at            | KISS1R           | KISS1 receptor                                                                      |
| 1552340_at           | SP7              | Sp7 transcription factor                                                            |
| 203963_at            | CA12             | carbonic anhydrase XII                                                              |
| 1554950_at           | AGC1             | aggrecan 1 (chondroitin sulfate proteoglycan 1, large aggregating proteoglycan)     |
| 232451_at            | ---              | MRNA; cDNA DKFZp564I0816 (from clone DKFZp564I0816)                                 |
| 227705_at            | TCEAL7           | transcription elongation factor A (SII)-like 7                                      |
| 1570574_at           | GPR177           | G protein-coupled receptor 177                                                      |
| 218273_s_at          | PPM2C            | protein phosphatase 2C, magnesium-dependent, catalytic subunit                      |
| 224735_at            | CYBASC3          | cytochrome b, ascorbate dependent 3                                                 |
| 239787_at            | KCTD4            | potassium channel tetramerisation domain containing 4                               |
| 226281_at            | DNER             | delta-notch-like EGF repeat-containing transmembrane                                |
| 218839_at            | HEY1             | hairly/enhancer-of-split related with YRPW motif 1                                  |
| 214710_s_at          | CCNB1            | cyclin B1                                                                           |
| 231798_at            | NOG              | Noggin                                                                              |
| 204595_s_at          | STC1             | stanniocalcin 1                                                                     |
| 209189_at            | FOS              | v-fos FBJ murine osteosarcoma viral oncogene homolog                                |
| 203297_s_at          | JARID2           | Jumonji, AT rich interactive domain 2                                               |
| 230137_at            | TMEM155          | transmembrane protein 155                                                           |

|              |                |                                                                                    |
|--------------|----------------|------------------------------------------------------------------------------------|
| 208078_s_at  | SNF1LK         | SNF1-like kinase /// SNF1-like kinase                                              |
| 217989_at    | DHRS8          | dehydrogenase/reductase (SDR family) member 8                                      |
| 229125_at    | ANKRD38        | ankyrin repeat domain 38                                                           |
| 205141_at    | ANG /// RNASE4 | angiogenin, ribonuclease, RNase A family, 5 /// ribonuclease, RNase A family, 4    |
| 204712_at    | WIF1           | WNT inhibitory factor 1                                                            |
| 1552960_at   | LRRC15         | leucine rich repeat containing 15                                                  |
| 225155_at    | SNHG5          | small nucleolar RNA host gene (non-protein coding) 5                               |
| 204351_at    | S100P          | S100 calcium binding protein P                                                     |
| 1569372_at   | TUBB2B         | Tubulin, beta 2B                                                                   |
| 205097_at    | SLC26A2        | solute carrier family 26 (sulfate transporter), member 2                           |
| 204881_s_at  | UGCG           | UDP-glucose ceramide glucosyltransferase                                           |
| 203434_s_at  | MME            | membrane metallo-endopeptidase (neutral endopeptidase, enkephalinase)              |
| 1568574_x_at | SPP1           | Secreted phosphoprotein 1 (osteopontin, bone sialoprotein I)                       |
| 206908_s_at  | CLDN11         | claudin 11 (oligodendrocyte transmembrane protein)                                 |
| 1556153_s_at | NFKBIZ         | Nuclear factor of kappa light polypeptide gene enhancer in B-cells inhibitor, zeta |
| 210643_at    | TNFSF11        | tumor necrosis factor (ligand) superfamily, member 11, RANKL                       |
| 203305_at    | F13A1          | coagulation factor XIII, A1 polypeptide                                            |
| 213791_at    | PENK           | proenkephalin                                                                      |
| 242324_x_at  | CCBE1          | collagen and calcium binding EGF domains 1                                         |
| 213338_at    | TMEM158        | transmembrane protein 158                                                          |
| 213139_at    | SNAI2          | snail homolog 2 (Drosophila)                                                       |
| 217979_at    | TSPAN13        | Tetraspanin 13                                                                     |
| 215420_at    | IHH            | Indian hedgehog homolog (Drosophila)                                               |
| 229645_at    | C18orf51       | chromosome 18 open reading frame 51                                                |
| 218717_s_at  | LEPREL1        | leprecan-like 1                                                                    |
| 238332_at    | ANKRD29        | ankyrin repeat domain 29                                                           |
| 205828_at    | MMP3           | matrix metalloproteinase 3 (stromelysin 1, progelatinase)                          |
| 209395_at    | CHI3L1         | chitinase 3-like 1 (cartilage glycoprotein-39)                                     |
| 204337_at    | RGS4           | regulator of G-protein signalling 4                                                |
| 201939_at    | PLK2           | polo-like kinase 2 (Drosophila)                                                    |
| 228844_at    | SLC13A5        | solute carrier family 13 (sodium-dependent citrate transporter), member 5          |
| 218468_s_at  | GREM1          | gremlin 1, cysteine knot superfamily, homolog (Xenopus laevis)                     |
| 201467_s_at  | NQO1           | NAD(P)H dehydrogenase, quinone 1                                                   |
| 224482_s_at  | RAB11FIP4      | RAB11 family interacting protein 4 (class II)                                      |
| 206239_s_at  | SPINK1         | serine peptidase inhibitor, Kazal type 1                                           |
| 213492_at    | COL2A1         | collagen, type II, alpha 1                                                         |
| 1552737_s_at | WWP2           | WW domain containing E3 ubiquitin protein ligase 2                                 |
| 204162_at    | KNTC2          | kinetochore associated 2                                                           |
| 213622_at    | COL9A2         | collagen, type IX, alpha 2                                                         |
| 202497_x_at  | SLC2A3         | solute carrier family 2 (facilitated glucose transporter), member 3                |
| 206309_at    | LECT1          | leukocyte cell derived chemotaxin 1                                                |
| 1556427_s_at | LOC221091      | similar to hypothetical protein                                                    |
| 201762_s_at  | PSME2          | proteasome (prosome, macropain) activator subunit 2 (PA28 beta)                    |
| 201795_at    | LBR            | lamin B receptor                                                                   |
| 209946_at    | VEGFC          | vascular endothelial growth factor C                                               |
| 210432_s_at  | SCN3A          | sodium channel, voltage-gated, type III, alpha                                     |
| 206439_at    | DSPG3          | dermatan sulfate proteoglycan 3                                                    |
| 203498_at    | DSCR1L1        | Down syndrome critical region gene 1-like 1                                        |
| 202912_at    | ADM            | adrenomedullin                                                                     |
| 221729_at    | COL5A2         | collagen, type V, alpha 2                                                          |
| 1555345_at   | SLC38A4        | solute carrier family 38, member 4                                                 |
| 210095_s_at  | IGFBP3         | insulin-like growth factor binding protein 3                                       |
| 201601_x_at  | IFITM1         | interferon induced transmembrane protein 1 (9-27)                                  |
| 205483_s_at  | ISG15          | ISG15 ubiquitin-like modifier                                                      |
| 1554685_a_at | KIAA1199       | KIAA1199                                                                           |
| 221019_s_at  | COLEC12        | collectin sub-family member 12 /// collectin sub-family member 12                  |
| 240448_at    | KIAA0802       | KIAA0802                                                                           |
| 200790_at    | ODC1           | ornithine decarboxylase 1                                                          |
| 206932_at    | CH25H          | cholesterol 25-hydroxylase                                                         |
| 205352_at    | SERPINI1       | serpin peptidase inhibitor, clade I (neuroserpin), member 1                        |
| 228640_at    | ---            | CDNA clone IMAGE:4800096                                                           |
| 205051_s_at  | KIT            | v-kit Hardy-Zuckerman 4 feline sarcoma viral oncogene homolog                      |
| 204731_at    | TGFB3          | transforming growth factor, beta receptor III (betaglycan, 300kDa)                 |

|              |                   |                                                                                |
|--------------|-------------------|--------------------------------------------------------------------------------|
| 221823_at    | C5orf30           | chromosome 5 open reading frame 30                                             |
| 1554736_at   | ARHGAP29          | Rho GTPase activating protein 29                                               |
| 217997_at    | PHLDA1            | pleckstrin homology-like domain, family A, member 1                            |
| 226907_at    | PPP1R14C          | protein phosphatase 1, regulatory (inhibitor) subunit 14C                      |
| 223235_s_at  | SMOC2             | SPARC related modular calcium binding 2                                        |
| 202403_s_at  | COL1A2            | collagen, type I, alpha 2                                                      |
| 204469_at    | PTPRZ1            | protein tyrosine phosphatase, receptor-type, Z polypeptide 1                   |
| 223614_at    | C8orf57           | chromosome 8 open reading frame 57                                             |
| 212850_s_at  | LRP4              | low density lipoprotein receptor-related protein 4                             |
| 202965_s_at  | CAPN6             | calpain 6                                                                      |
| 223316_at    | CCDC3             | coiled-coil domain containing 3                                                |
| 200974_at    | ACTA2             | actin, alpha 2, smooth muscle, aorta                                           |
| 213293_s_at  | TRIM22            | tripartite motif-containing 22                                                 |
| 222020_s_at  | HNT               | neurotrimin                                                                    |
| 210609_s_at  | TP53I3            | tumor protein p53 inducible protein 3                                          |
| 201739_at    | SGK               | serum/glucocorticoid regulated kinase                                          |
| 217995_at    | SQRDL             | sulfide quinone reductase-like (yeast)                                         |
| 204682_at    | LTBP2             | latent transforming growth factor beta binding protein 2                       |
| 201195_s_at  | SLC7A5            | solute carrier family 7 (cationic amino acid transporter, y+ system), member 5 |
| 206764_x_at  | MPPE1             | metallophosphoesterase 1                                                       |
| 213060_s_at  | CHI3L2            | chitinase 3-like 2 /// chitinase 3-like 2                                      |
| 205334_at    | S100A1            | S100 calcium binding protein A1                                                |
| 209955_s_at  | FAP               | fibroblast activation protein, alpha                                           |
| 204035_at    | SCG2              | secretogranin II (chromogranin C)                                              |
| 217875_s_at  | TMEPAI            | transmembrane, prostate androgen induced RNA                                   |
| 203879_at    | PIK3CD            | phosphoinositide-3-kinase, catalytic, delta polypeptide                        |
| 202709_at    | FMOD              | fibromodulin                                                                   |
| 1554737_at   | FBN2              | fibrillin 2 (congenital contractural arachnodactyly)                           |
| 205941_s_at  | COL10A1           | collagen, type X, alpha 1 (Schmid metaphyseal chondrodysplasia)                |
| 202727_s_at  | IFNGR1            | interferon gamma receptor 1                                                    |
| 226930_at    | FNDC1             | fibronectin type III domain containing 1                                       |
| 207001_x_at  | TSC22D3           | TSC22 domain family, member 3                                                  |
| 206960_at    | GPR23             | G protein-coupled receptor 23                                                  |
| 203666_at    | CXCL12            | chemokine (C-X-C motif) ligand 12 (stromal cell-derived factor 1)              |
| 204320_at    | COL11A1           | collagen, type XI, alpha 1                                                     |
| 203058_s_at  | PAPSS2            | 3'-phosphoadenosine 5'-phosphosulfate synthase 2                               |
| 205870_at    | BDKRB2            | bradykinin receptor B2                                                         |
| 201464_x_at  | JUN               | v-jun sarcoma virus 17 oncogene homolog (avian)                                |
| 226989_at    | RGMB              | RGM domain family, member B                                                    |
| 229740_at    | LOC643008         | PP12104                                                                        |
| 203304_at    | BAMBI             | BMP and activin membrane-bound inhibitor homolog ( <i>Xenopus laevis</i> )     |
| 218899_s_at  | BAALC             | brain and acute leukemia, cytoplasmic                                          |
| 224348_s_at  | H19               | H19, imprinted maternally expressed untranslated mRNA                          |
| 209560_s_at  | DLK1              | delta-like 1 homolog ( <i>Drosophila</i> )                                     |
| 222162_s_at  | ADAMTS1           | ADAM metalloproteinase with thrombospondin type 1 motif, 1                     |
| 206115_at    | EGR3              | early growth response 3                                                        |
| 1562094_at   | MGC26963          | Hypothetical protein MGC26963                                                  |
| 216952_s_at  | LMNB2             | lamin B2                                                                       |
| 210948_s_at  | LEF1              | lymphoid enhancer-binding factor 1                                             |
| 1563466_at   | MYLK              | Myosin, light polypeptide kinase                                               |
| 212689_s_at  | JMJD1A            | jumonji domain containing 1A                                                   |
| 205347_s_at  | TMSL8             | thymosin-like 8                                                                |
| 204967_at    | SHROOM2           | shroom family member 2                                                         |
| 218009_s_at  | PRC1              | protein regulator of cytokinesis 1                                             |
| 212067_s_at  | C1R /// LOC643676 | complement component 1, r subcomponent                                         |
| 1560259_at   | RORA              | RAR-related orphan receptor A                                                  |
| 206432_at    | HAS2              | hyaluronan synthase 2                                                          |
| 1561065_at   | ANKRD6            | Ankyrin repeat domain 6                                                        |
| 1555800_at   | ZNF533            | zinc finger protein 533                                                        |
| 219747_at    | C4orf31           | chromosome 4 open reading frame 31                                             |
| 1558636_s_at | ADAMTS5           | ADAM metalloproteinase with thrombospondin type 1 motif, 5 (aggrecanase-2)     |
| 227497_at    | ---               | CDNA FLJ11723 fis, clone HEMBA1005314                                          |
| 1555527_at   | COL9A1            | collagen, type IX, alpha 1                                                     |

|              |           |                                                                                         |
|--------------|-----------|-----------------------------------------------------------------------------------------|
| 202768_at    | FOSB      | FBJ murine osteosarcoma viral oncogene homolog B                                        |
| 204221_x_at  | GLIPR1    | GLI pathogenesis-related 1 (glioma)                                                     |
| 204774_at    | EVI2A     | ecotropic viral integration site 2A                                                     |
| 206157_at    | PTX3      | pentraxin-related gene, rapidly induced by IL-1 beta                                    |
| 202643_s_at  | TNFAIP3   | tumor necrosis factor, alpha-induced protein 3                                          |
| 234994_at    | KIAA1913  | KIAA1913                                                                                |
| 227475_at    | FOXQ1     | forkhead box Q1                                                                         |
| 219334_s_at  | OBFC2A    | oligonucleotide/oligosaccharide-binding fold containing 2A                              |
| 218986_s_at  | FLJ20035  | hypothetical protein FLJ20035                                                           |
| 228382_at    | FAM105B   | family with sequence similarity 105, member B                                           |
| 205523_at    | HAPLN1    | hyaluronan and proteoglycan link protein 1                                              |
| 224967_at    | UGCG      | UDP-glucose ceramide glucosyltransferase                                                |
| 213817_at    | ---       | CDNA FLJ13601 fis, clone PLACE1010069                                                   |
| 212900_at    | SEC24A    | SEC24 related gene family, member A (S. cerevisiae)                                     |
| 1552619_a_at | ANLN      | anillin, actin binding protein                                                          |
| 224609_at    | SLC44A2   | solute carrier family 44, member 2                                                      |
| 203755_at    | BUB1B     | BUB1 budding uninhibited by benzimidazoles 1 homolog beta (yeast)                       |
| 1555724_s_at | TAGLN     | transgelin                                                                              |
| 202450_s_at  | CTSK      | cathepsin K (pseudosostosis)                                                            |
| 213861_s_at  | FAM119B   | family with sequence similarity 119, member B                                           |
| 213248_at    | LOC221362 | hypothetical protein LOC221362                                                          |
| 203570_at    | LOXL1     | lysyl oxidase-like 1                                                                    |
| 230407_at    | ---       | Transcribed locus, strongly similar to strawberry notch homolog 1; MOP-3                |
| 209567_at    | RRS1      | RRS1 ribosome biogenesis regulator homolog (S. cerevisiae)                              |
| 210512_s_at  | VEGF      | vascular endothelial growth factor                                                      |
| 205289_at    | BMP2      | bone morphogenetic protein 2                                                            |
| 203065_s_at  | CAV1      | caveolin 1, caveolae protein, 22kDa                                                     |
| 203758_at    | CTSO      | cathepsin O                                                                             |
| 205476_at    | CCL20     | chemokine (C-C motif) ligand 20                                                         |
| 207826_s_at  | ID3       | inhibitor of DNA binding 3, dominant negative helix-loop-helix protein                  |
| 205479_s_at  | PLAU      | plasminogen activator, urokinase                                                        |
| 201136_at    | PLP2      | proteolipid protein 2 (colonic epithelium-enriched)                                     |
| 203764_at    | DLG7      | discs, large homolog 7 (Drosophila)                                                     |
| 209160_at    | AKR1C3    | aldo-keto reductase family 1, member C3 (3-alpha hydroxysteroid dehydrogenase, type II) |
| 207977_s_at  | DPT       | dermatopontin                                                                           |
| 205125_at    | PLCD1     | phospholipase C, delta 1                                                                |
| 207980_s_at  | CITED2    | Cbp/p300-interacting transactivator, with Glu/Asp-rich carboxy-terminal domain, 2       |
| 204475_at    | MMP1      | matrix metalloproteinase 1 (interstitial collagenase)                                   |
| 1556209_at   | CLEC2B    | C-type lectin domain family 2, member B                                                 |
| 205830_at    | CLGN      | calmegin                                                                                |
| 219295_s_at  | PCOLCE2   | procollagen C-endopeptidase enhancer 2                                                  |
| 205907_s_at  | OMD       | osteomodulin                                                                            |
| 206869_at    | CHAD      | chondroadherin                                                                          |
| 223836_at    | KSP37     | Ksp37 protein                                                                           |
| 204948_s_at  | FST       | follistatin                                                                             |
| 240955_at    | PANX3     | pannexin 3                                                                              |
